# Supplementary material
Source: PubMed Central journal article supplement (PMC3005598)
Supplement: supp_138.2.215_DEV050161FigS1.pdf [file supp_138.2.215_DEV050161FigS1.pdf]

| Site: | 1a                                                 | 1b                                 | 2                                 | 3                              | 4 |
|-------|----------------------------------------------------|------------------------------------|-----------------------------------|--------------------------------|---|
| mel   | ...TTTT <b>TTCTCACACTTACCTTTCCACAC</b> CCCCC...    | ...GTCAG <b>CGTGTGAA</b> AATACC... | ...AAGAG <b>TTCCACG</b> ACCAC...  | ...TTCGG <b>CGTGTGAA</b> ATTTT |   |
| sim   | ...TTTT <b>TTCTCACACTTACCTTTCCACAC</b> CCCCC...    | ...GTCAG <b>CGTGTGAA</b> AATACC... | ...AAGAG <b>TTCCACG</b> ACCAC...  | ...TTCGG <b>CGTGTGAA</b> ATTTT |   |
| dsec  | ...TTTT <b>TTCTCACACTTACCTTTCCACAC</b> CCCCC...    | ...GTCAG <b>CGTGTGAA</b> AATATC... | ...AAGAG <b>TTCCACG</b> ACCAC...  | ...TTCGG <b>CGTGTGAA</b> ATTTT |   |
| dyak  | ...TTTT <b>TTCTCACACTTACCTTTCCACAC</b> CCCCC...    | ...GTCAG <b>CGTGTGAA</b> AATGCC... | ...AAAAG <b>TTCCACG</b> ACCAC...  | ...TTCGG <b>CGTGTGAA</b> ATTTT |   |
| dere  | ...TTTCT <b>TTCTCACACTTACCTTTCCACAC</b> CCCCC...   | ...GTCAG <b>CGTGTGAA</b> AATACC... | ...AAGAG <b>TTCCACG</b> ACCAC...  | ...TTCGG <b>CGTGTGAA</b> ATTTT |   |
| ana   | ...CTCTT <b>TTCTCACACTTTTATTTCCAGCCG</b> GAGTA...  | ...GTCGG <b>CGTGTGAA</b> AATATC... | ...GAAAG <b>TTCCACG</b> ACCAC...  | ...AGCAG <b>CGTGTGAA</b> CGAAA |   |
| pse   | ...CCTTT <b>TTCTCACACTTATTTCCACCCCA</b> CCCCC...   | ...GTCAG <b>CGTGTGAA</b> AATATC... | ...AAAA <b>TTCCACG</b> ACCAC...   | ...AGGAG <b>CGTGTGAA</b> AATGC |   |
| per   | ...CCTTT <b>TTCTCACACTTATTTCCACCCCA</b> CCCCC...   | ...GTCAG <b>CGTGTGAA</b> AATATC... | ...AAAA <b>TTCCACG</b> ACCAC...   | ...AGGAG <b>CGTGTGAA</b> AATGC |   |
| wil   | ...TTTT <b>TTCTCACACCTCAATTTCCATA</b> AAATAAG...   | ...CTATT <b>CGTGTGAA</b> TATCT...  | ...CAAAA <b>TTCCACG</b> ATATA...  | ...GGAAG <b>CGTGTGAA</b> ATTTT |   |
| gri   | ...TATAA <b>TTCTCACACCTCGCATTTCC</b> CATCATCGAT... | ...AGCGG <b>CGTGTGAA</b> TTTAT...  | ...AAAA <b>TTCCACG</b> ACCAC...   | ...CAAAG <b>CGTGTGAA</b> CTTTC |   |
| moj   | .....                                              | ...ACCAT <b>CGTGTGAA</b> TTTGT...  | ...GAAAA <b>TTCCACG</b> ACCAC...  | ...CAAAG <b>CGTGTGAA</b> CTGCT |   |
| vir   | .....                                              | ...GCCGC <b>CGTGTGAA</b> TTTTT...  | ...GAAAA <b>TTCTCACG</b> ACCAC... | ...TAAAG <b>CGTGTGAA</b> CTCCC |   |

### Summary

Site 1a: **GTGTGAGAA** (9/9 conserved, 10 species, –Dmoj –Dvir)

Site 1b: **TGTGGGAA** [30/30 conserved (see below\*), including Site 1a, 5 species: Dmel, Dsim, Dsec, Dyak, Dere]

Site 2: **CGTGTGAA** (8/8 conserved, all 12 species)

Site 3: **TCGTGGGAA** (9/9 conserved, all 12 species except Dvir: **TCGTGAGAA**; this remains a high-affinity site)

Site 4: **GCGTGTGAA** (9/9 conserved, all 12 species)

\*GGGGGGTGTGGGAAAAGGTAAGTGTGAGAA
