# Supplementary material
Source: PubMed Central journal article supplement (PMC3005598)
Supplement: supp_138.2.215_DEV050161TableS1.pdf [file supp_138.2.215_DEV050161TableS1.pdf]

**Table S1. Oligonucleotide sequences**

| TYPE/DESIGNATION                                   | SEQUENCE                                                                               |
|----------------------------------------------------|----------------------------------------------------------------------------------------|
| <b>EMSA oligonucleotides</b>                       |                                                                                        |
| m4 S3                                              | CCGAAACTGTGGGAACCTGGTAGA                                                               |
| numb S1a                                           | CTTTTTTTTCTCACACTTACCTT                                                                |
| numb S1b                                           | CTTACCTTTTCCCACACCCCGC                                                                 |
| numb S2                                            | TGGGTCAGCGTGTGAAATACCTTT                                                               |
| numb S2mut                                         | TGGGTCAGCGTGTCAAATACCTTT                                                               |
| numb S3                                            | ACGAAGAGTTCCCACGACCACCGA                                                               |
| numb S4                                            | CACTTCGGCGTGTGAAATTTCAA                                                                |
| <b>PCR primers for reporter gene constructs</b>    |                                                                                        |
| numb 2.5-F                                         | <b>ggggtacc</b> ccGGCTGCATTGTTTTCAAACGACAG                                             |
| numb 2.5-R                                         | ga <b>agatctt</b> cTGGAGTATGACACCTCGGTAATCC                                            |
| numb CD1-F                                         | ga <b>agatctt</b> cTTCTAATATTTGCATCCTGCCAGC                                            |
| numb CD1-R                                         | <b>ggggtacc</b> ccATTCTTCGATCTCGATCGTAGCT                                              |
| numb CD2-F                                         | ga <b>agatctt</b> cGATAGTATGATAGTGTATGTTT                                              |
| numb CD2-R                                         | <b>ggggtacc</b> ccTATCATCACTTCAATGGTTTTCC                                              |
| <b>PCR primers for in situ hybridization probe</b> |                                                                                        |
| numb IS-F                                          | gc <b>gaattc</b> GGATTACTTTCATGTCAGCGGAGAC                                             |
| numb IS-R                                          | ggc <b>gcgccgc</b> GTGGGTAACCTGGTAGCTTGTTCA                                            |
| <b>PCR primers for CD2 enhancer mutagenesis</b>    |                                                                                        |
| numb Su(H) S3m-F                                   | ACGAAGAGTTGCCACGACCACCGA                                                               |
| numb Su(H) S3m-R                                   | TCGGTGGTCGTGGCAACTCTTCGT                                                               |
| numb Su(H) S4m-F                                   | CACTTCGGCGTGTCAAATTTCAA                                                                |
| numb Su(H) S4m-R                                   | TTGAAAATTTGACACGCCGAAGTG                                                               |
| <b>Su(H) short hairpin oligonucleotides</b>        |                                                                                        |
| Su(H)-NE-F                                         | <b>ctagc</b> agtAACACTTTATCCTGTGGTCAtagttatattcaagcataTCACCGACAGCATAAAGTGTT <b>gcg</b> |
| Su(H)-NE-R                                         | <b>aattc</b> gcAACACTTTATGCTGTGGTGAtagtcttgaatataactaTGACCGACAGGATAAAGTGTT <b>actg</b> |

Terminal lowercase letters denote synthetic restriction sites (bold) used for cloning into the vector.
