# Supplementary material
Source: PubMed Central journal article supplement (PMC3005598)
Supplement: supp_138.2.215_DEV050161TableS2.pdf [file supp_138.2.215_DEV050161TableS2.pdf]

**Table S2. Rescue of macrochaete bristle phenotype in *numb*<sup>2</sup> mosaic territories\***

| Rescue Construct | Phenotypes             |            |            |                 | % Multiple Socket |
|------------------|------------------------|------------|------------|-----------------|-------------------|
|                  | Wild-type (1 so, 1 sh) | 2 so, 0 sh | 4 so, 0 sh | Other           |                   |
| No RC            | 5                      | 15         | 55         | 17 <sup>†</sup> | 88.0 (81/92)      |
| RCwt line A/+    | 68                     | 0          | 0          | 4 <sup>‡</sup>  | 0.0 (0/72)        |
| RCwt line D/+    | 126                    | 0          | 0          | 7 <sup>§</sup>  | 0.0 (0/133)       |
| RC2del line A/+  | 66                     | 2          | 0          | 0               | 2.9 (2/68)        |
| RC2del line B/+  | 171                    | 11         | 0          | 5 <sup>¶</sup>  | 5.9 (11/187)      |

\*See also Fig. 7.

<sup>†</sup>Other=11 (3 so, 1 sh); 3 (missing); 3 (uncharacterizable).

<sup>‡</sup>Other=3 (duplicated bristles); 1 (0 so, 2 sh).

<sup>§</sup>Other=4 (missing); 3 (duplicated).

<sup>¶</sup>Other=2 (duplicated); 2 (missing); 1 (uncharacterizable).

so, socket cuticular structure; sh, shaft cuticular structure.
