# Supplementary material
Source: PubMed Central journal article supplement (PMC3005598)

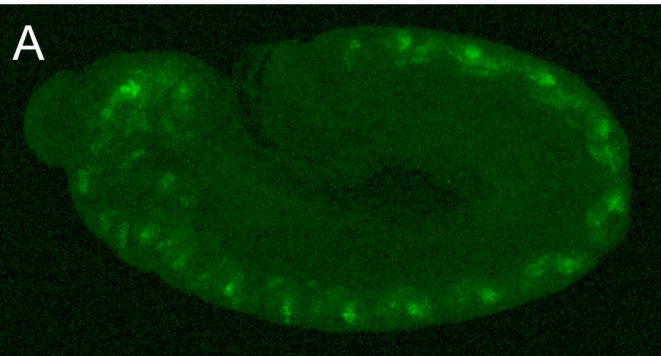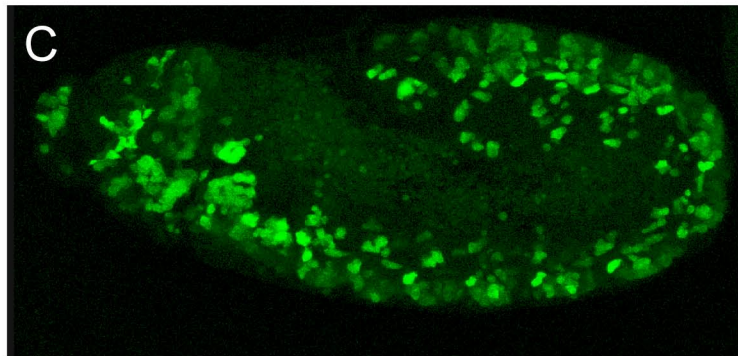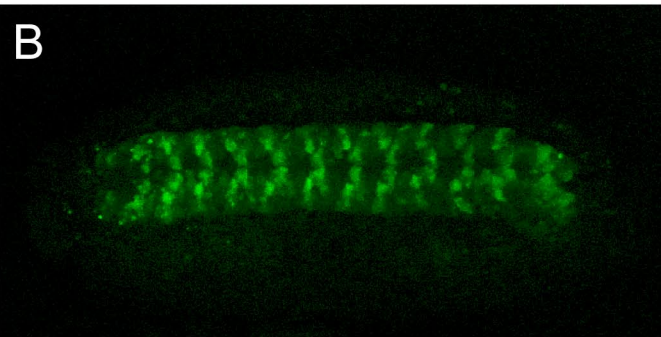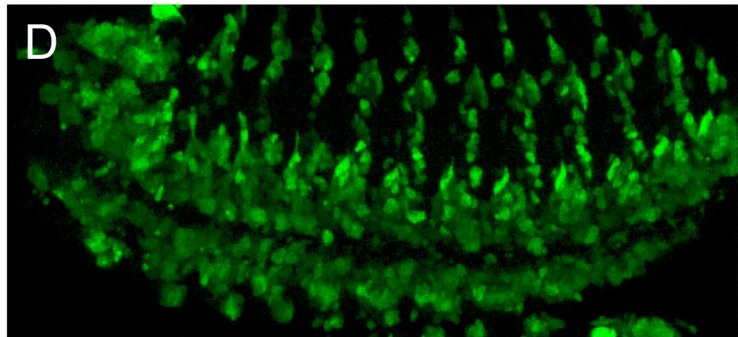

CD1-GFP

CD2-GFP

Supplement: supp_138.2.215_DEV050161FigS2.pdf [file supp_138.2.215_DEV050161FigS2.pdf]

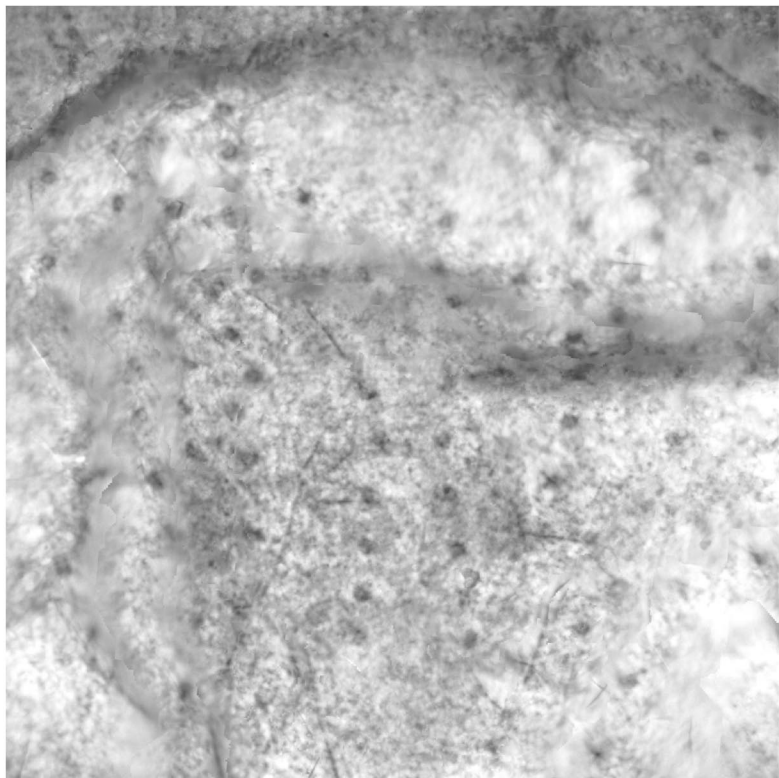

Supplement: supp_138.2.215_DEV050161FigS3.pdf [file supp_138.2.215_DEV050161FigS3.pdf]

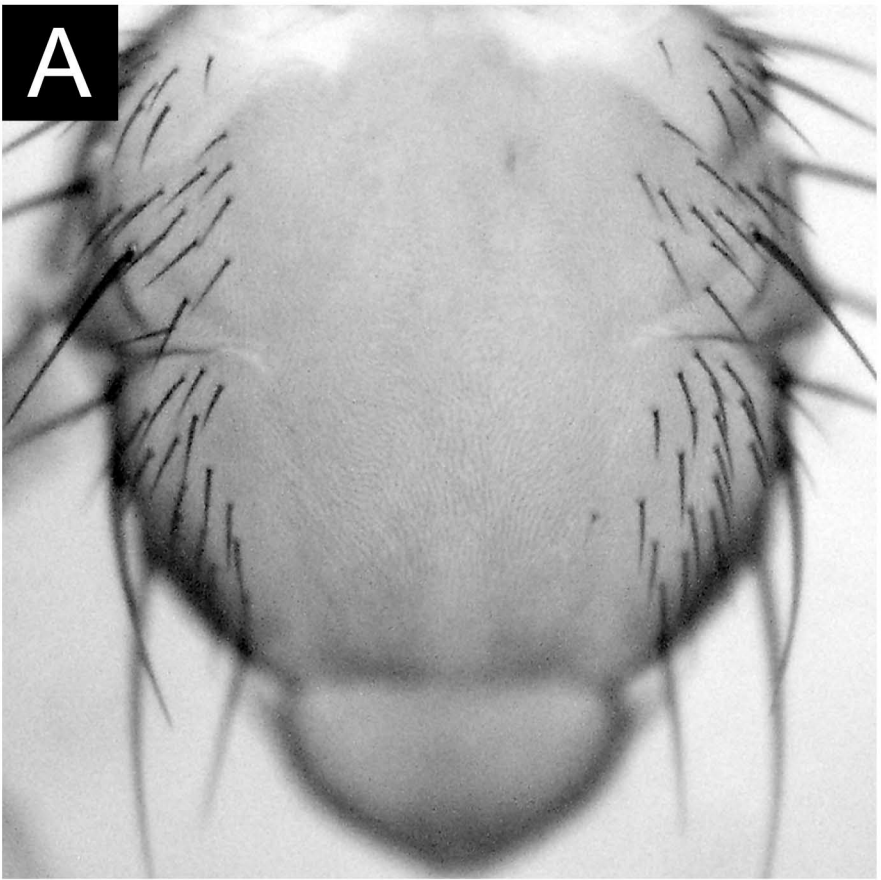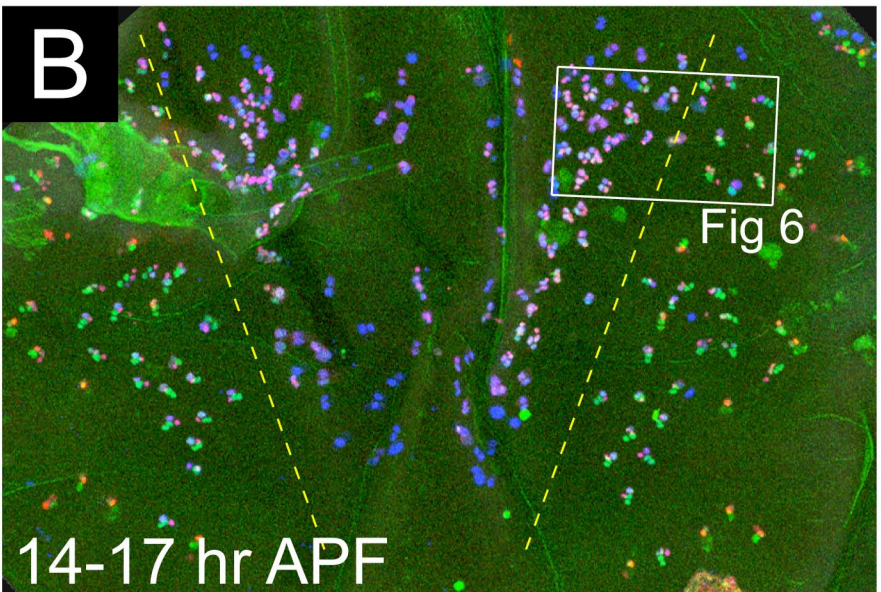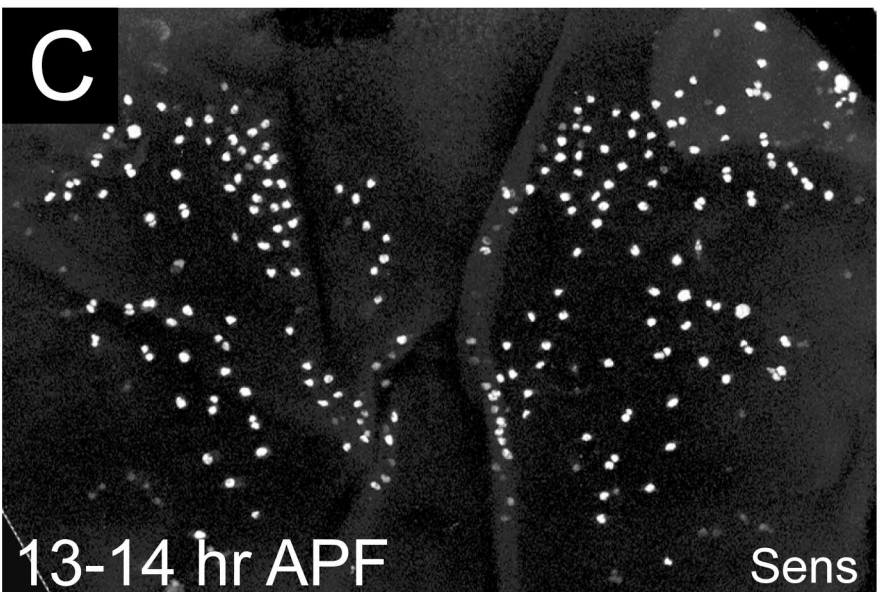

Supplement: supp_138.2.215_DEV050161FigS4.pdf [file supp_138.2.215_DEV050161FigS4.pdf]

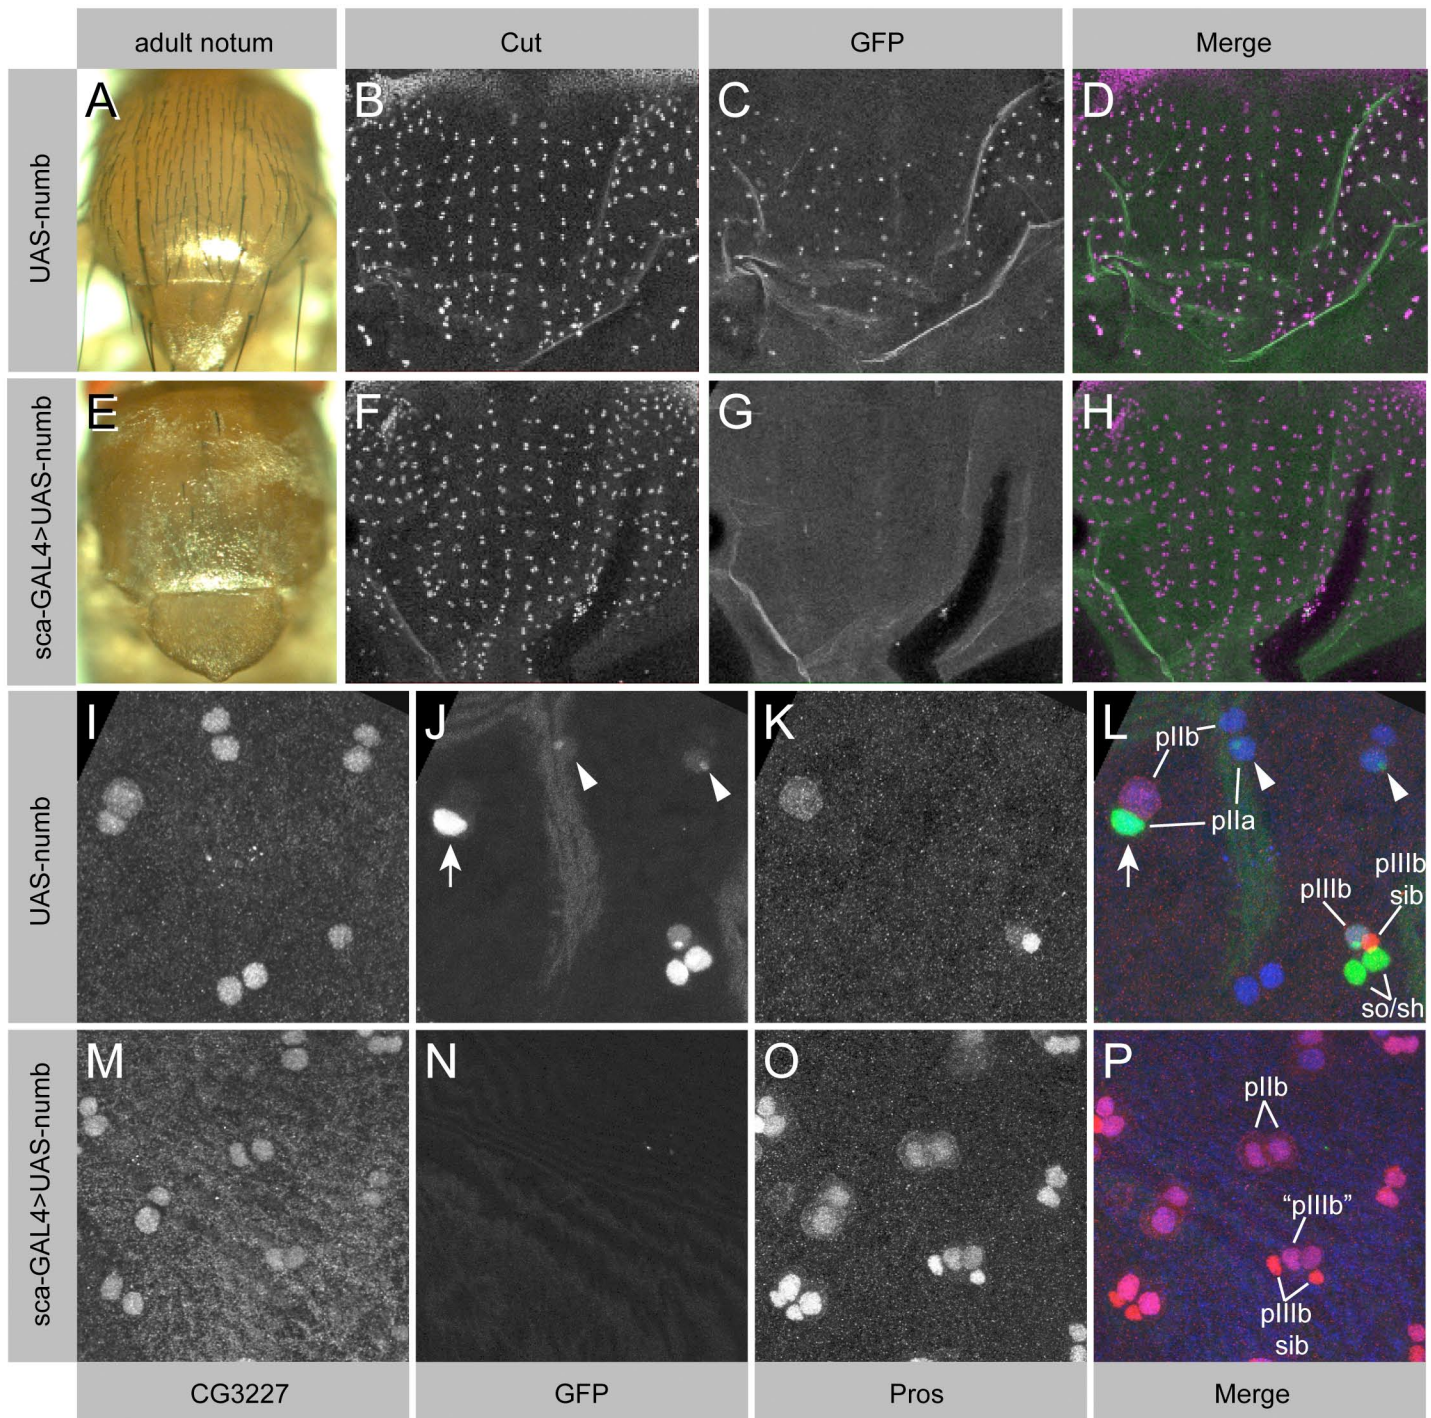

Supplement: supp_138.2.215_DEV050161FigS5.pdf [file supp_138.2.215_DEV050161FigS5.pdf]

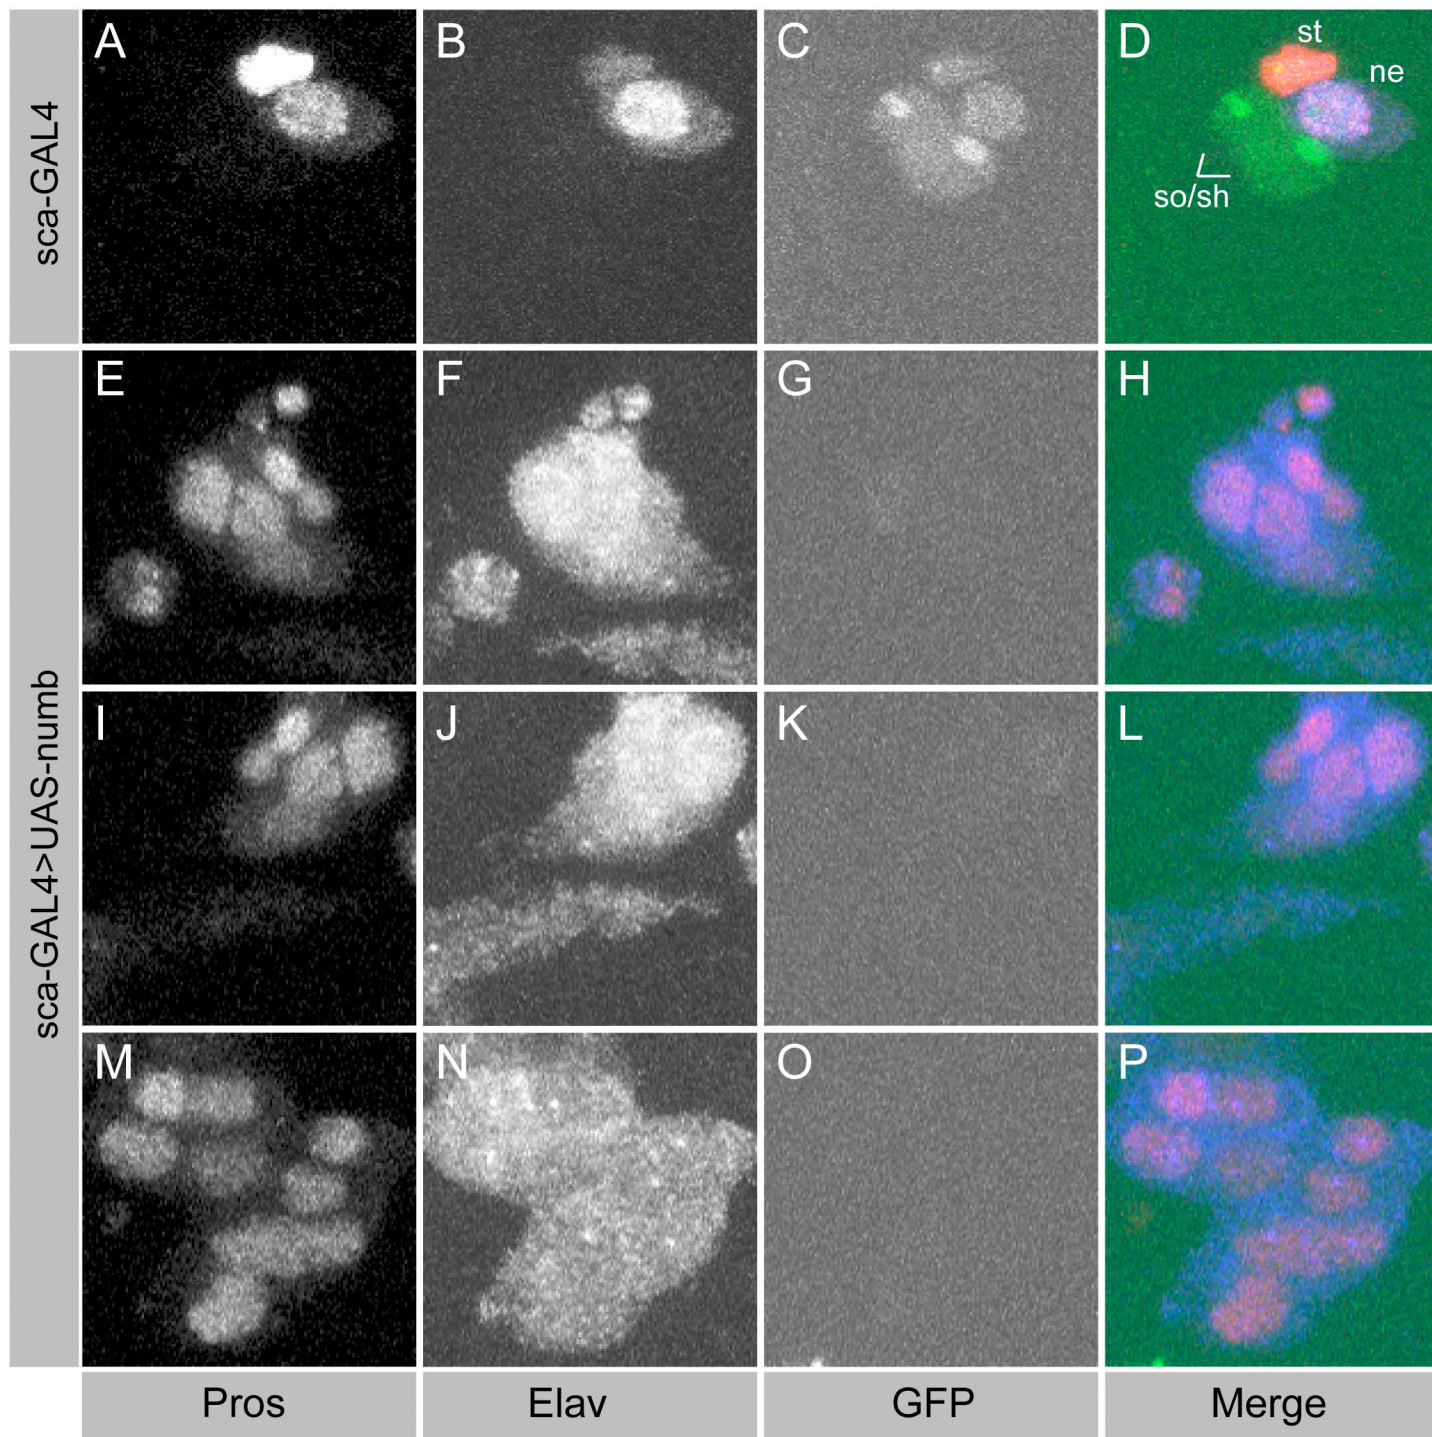

Supplement: supp_138.2.215_DEV050161FigS6.pdf [file supp_138.2.215_DEV050161FigS6.pdf]

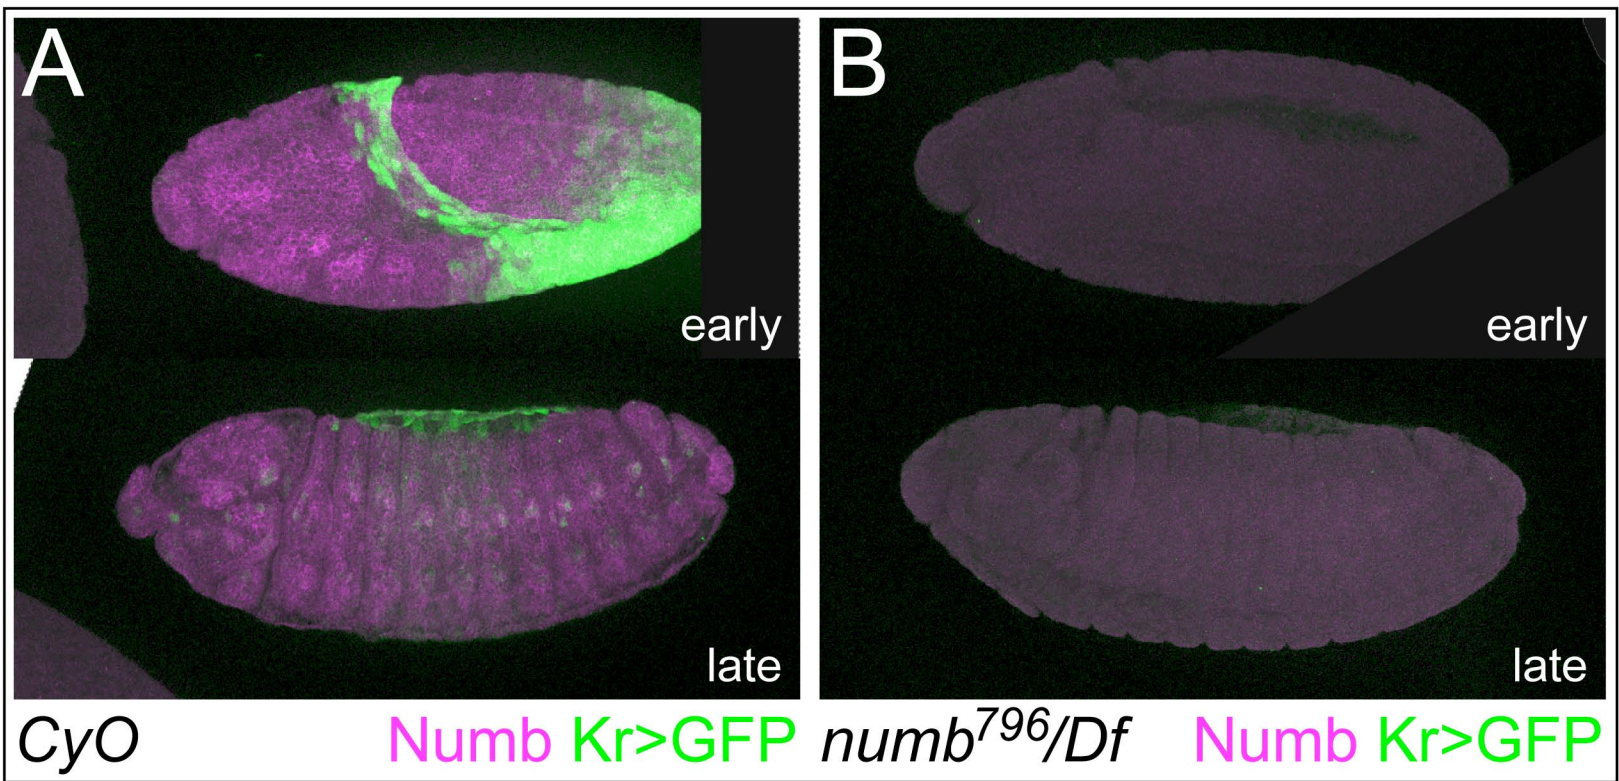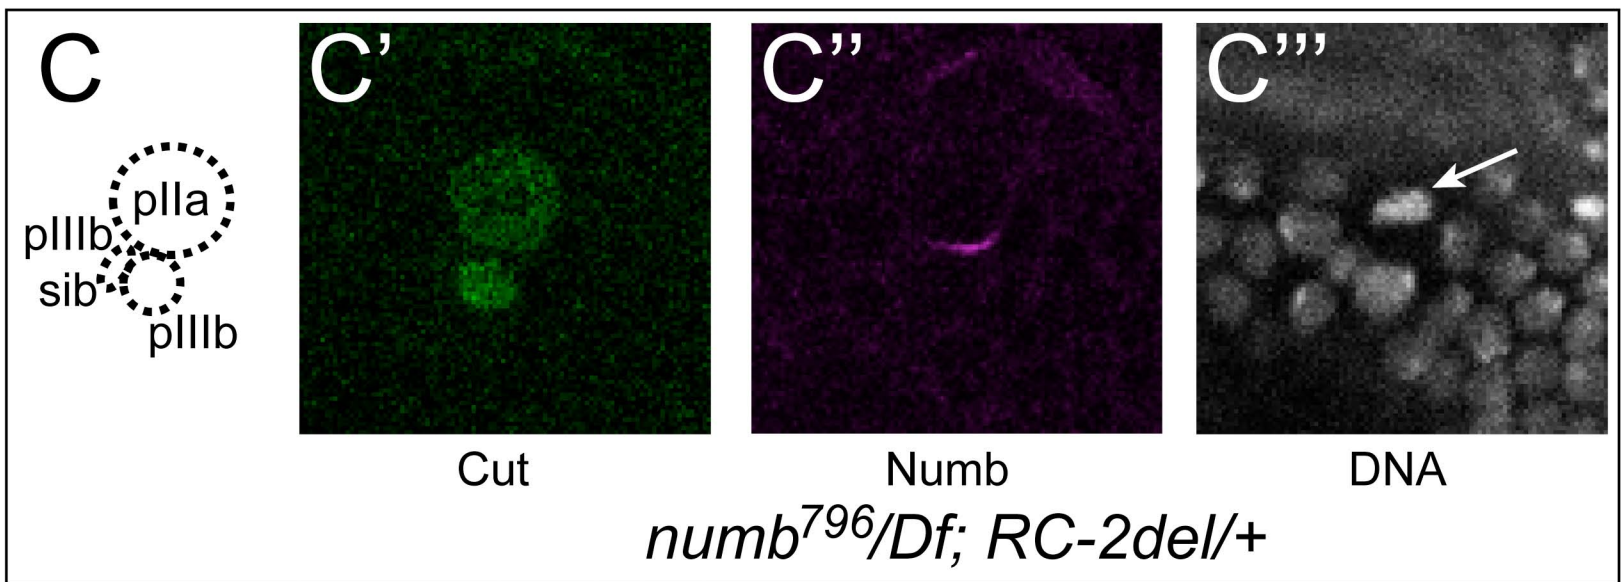

Supplement: supp_138.2.215_DEV050161FigS7.pdf [file supp_138.2.215_DEV050161FigS7.pdf]
